# Supplementary material for: Interplay between Tumor Mutational Burden and Mutational Profile and Its Effect on Overall Survival: A Pilot Study of Metastatic Patients Treated with Immune Checkpoint Inhibitors
Source: MDPI journal article supplement (doi:10.3390/cancers14215433), 2022-11-04
Supplement: s1 [file s1]

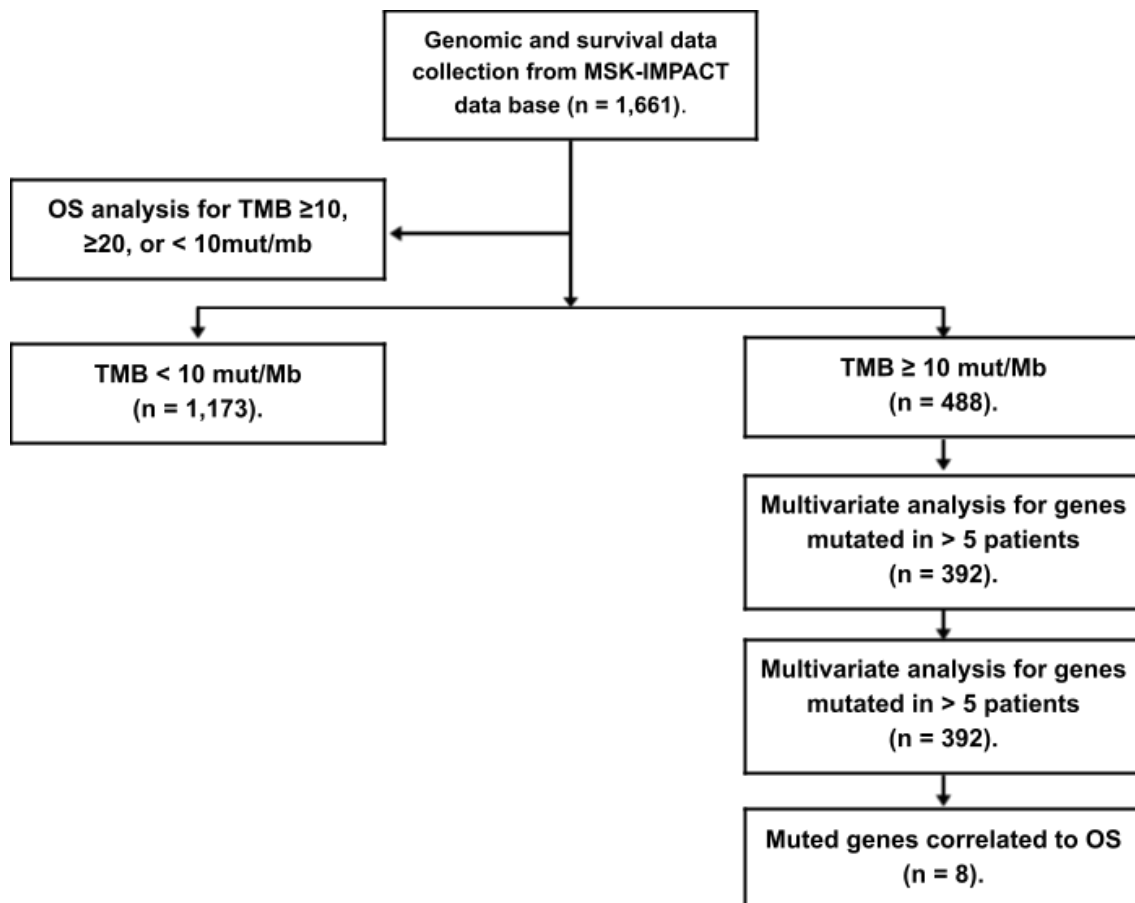

**Figure S1.** Study design flowchart. OS = overall survival; TMB = tumor mutational burden; mut/Mb = mutations per megabase; MSI = microsatellite instability.

**Table S1.** Individual survival data for genes at univariate analysis.

| Gene          | Patients (N) | Median OS (months) | P value |
|---------------|--------------|--------------------|---------|
| <i>STK11</i>  |              |                    |         |
| <i>mut</i>    | 40           | 7                  | 0.00004 |
| <i>wt</i>     | 448          | 44                 |         |
| <i>KEAP1</i>  |              |                    |         |
| <i>mut</i>    | 52           | 13                 | 0.002   |
| <i>wt</i>     | 436          | 44                 |         |
| <i>CIC</i>    |              |                    |         |
| <i>mut</i>    | 49           | 41                 | 0.02    |
| <i>wt</i>     | 439          | 42                 |         |
| <i>E2F3</i>   |              |                    |         |
| <i>mut</i>    | 14           | 12                 | 0.03    |
| <i>wt</i>     | 474          | 44                 |         |
| <i>TP53</i>   |              |                    |         |
| <i>mut</i>    | 271          | 28                 | 0.03    |
| <i>wt</i>     | 217          | 47                 |         |
| <i>NTRK3</i>  |              |                    |         |
| <i>mut</i>    | 57           | NR                 | 0.0009  |
| <i>wt</i>     | 431          | 36                 |         |
| <i>TERT</i>   |              |                    |         |
| <i>mut</i>    | 263          | 49                 | 0.002   |
| <i>wt</i>     | 225          | 34                 |         |
| <i>NOTCH3</i> |              |                    |         |
| <i>mut</i>    | 77           | 47                 | 0.003   |
| <i>wt</i>     | 411          | 41                 |         |
| <i>RNF43</i>  |              |                    |         |
| <i>mut</i>    | 52           | NR                 | 0.004   |
| <i>wt</i>     | 436          | 36                 |         |

|               |     |    |       |
|---------------|-----|----|-------|
| <i>TET1</i>   |     |    |       |
| <i>mut</i>    | 55  | NR | 0.005 |
| <i>wt</i>     | 433 | 36 |       |
| <i>PTPRD</i>  |     |    |       |
| <i>mut</i>    | 125 | NR | 0.006 |
| <i>wt</i>     | 363 | 41 |       |
| <i>NCOA3</i>  |     |    |       |
| <i>mut</i>    | 28  | NR | 0.008 |
| <i>wt</i>     | 460 | 41 |       |
| <i>TENT5C</i> |     |    |       |
| <i>mut</i>    | 15  | NR | 0.008 |
| <i>wt</i>     | 473 | 41 |       |
| <i>ZFHX3</i>  |     |    |       |
| <i>mut</i>    | 91  | NR | 0.01  |
| <i>wt</i>     | 397 | 41 |       |
| <i>RIT1</i>   |     |    |       |
| <i>mut</i>    | 11  | NR | 0.02  |
| <i>wt</i>     | 477 | 42 |       |
| <i>CCNE1</i>  |     |    |       |
| <i>mut</i>    | 9   | NR | 0.03  |
| <i>wt</i>     | 479 | 42 |       |
| <i>PPM1D</i>  |     |    |       |
| <i>mut</i>    | 21  | NR | 0.03  |
| <i>wt</i>     | 467 | 42 |       |
| <i>GATA2</i>  |     |    |       |
| <i>mut</i>    | 12  | NR | 0.03  |
| <i>wt</i>     | 476 | 42 |       |
| <i>ALK</i>    |     |    |       |
| <i>mut</i>    | 73  | 42 | 0.03  |

|              |     |    |      |
|--------------|-----|----|------|
| <i>wt</i>    | 415 | 36 |      |
| <i>DNMT1</i> |     |    |      |
| <i>mut</i>   | 39  | NR | 0.04 |
| <i>wt</i>    | 449 | 41 |      |
| <i>PTPRT</i> |     |    |      |
| <i>mut</i>   | 126 | 44 | 0.04 |
| <i>wt</i>    | 362 | 36 |      |
| <i>MET</i>   |     |    |      |
| <i>mut</i>   | 38  | NR | 0.04 |
| <i>wt</i>    | 450 | 41 |      |
| <i>EPHA7</i> |     |    |      |
| <i>mut</i>   | 76  | NR | 0.04 |
| <i>wt</i>    | 412 | 41 |      |
| <i>BCL6</i>  |     |    |      |
| <i>mut</i>   | 18  | NR | 0.04 |
| <i>wt</i>    | 470 | 41 |      |
| <i>SMO</i>   |     |    |      |
| <i>mut</i>   | 32  | NR | 0.04 |
| <i>wt</i>    | 456 | 46 |      |
| <i>CDK6</i>  |     |    |      |
| <i>mut</i>   | 8   | NR | 0.04 |
| <i>wt</i>    | 480 | 42 |      |
| <i>MED12</i> |     |    |      |
| <i>mut</i>   | 38  | NR | 0.04 |
| <i>wt</i>    | 450 | 42 |      |

N = number; OS = overall survival; NR = not reached.

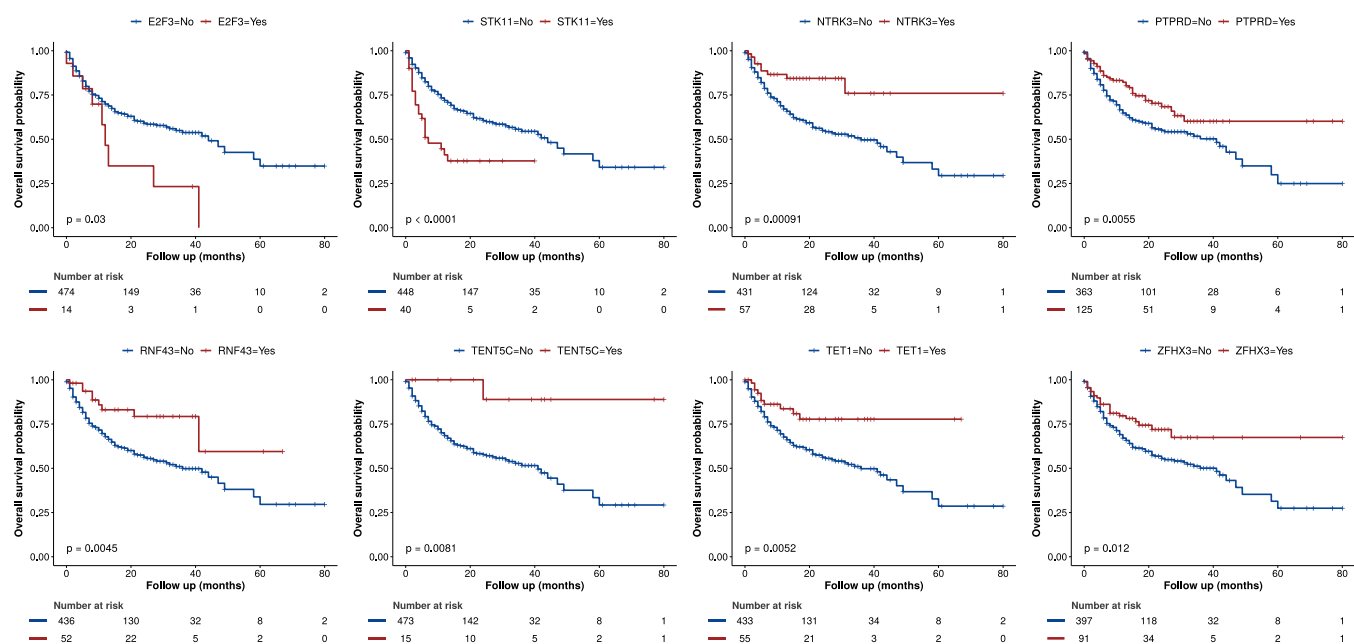

**Figure S2.** Kaplan–Meier (KM) curves for each gene related with survival after Cox multivariate analysis. Kaplan–Meier (KM) curves for overall survival for patients harboring gene mutations related with survival after Cox multivariate analysis (E2F3, STK11, NTRK3, PTPRD, RNF43, TENT5C, TET1, and ZFH3) compared to the wild-type ones.

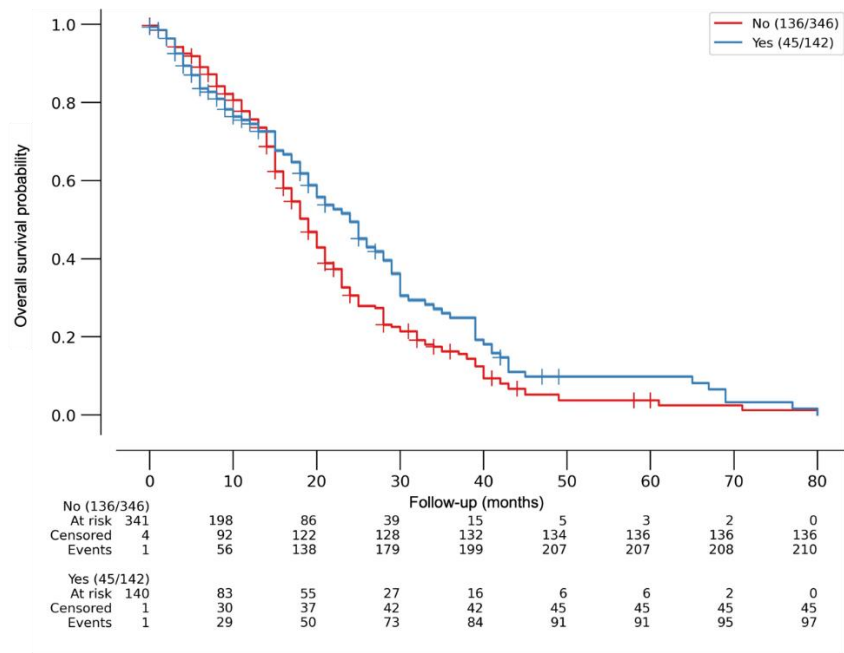

**Figure S3.** Effect of Microsatellite Instability (MSI) on overall survival after ICI treatment. Kaplan–Meier (KM) curves for TMB-high/MSI and with TMB-high/MSS tumors. Exploratory analyses performed in our TMB-high cohort identified that patients with TMB-high/MSI tumors exhibit better OS outcomes when compared with TMB-high/MSS tumors (median OS 42 vs 19 months;  $P < 0,05$ ).

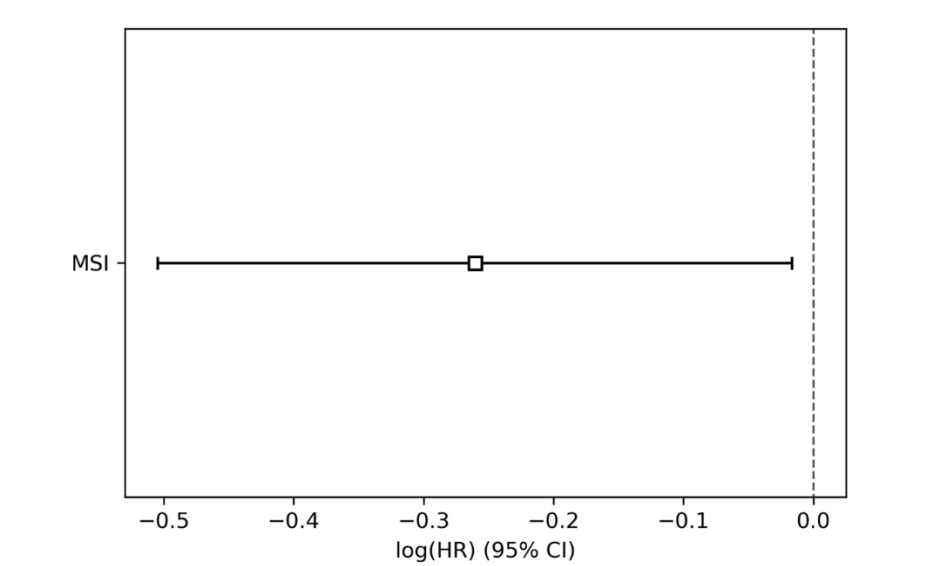

**Figure S4.** Effect of Microsatellite Instability (MSI) on overall survival after ICI treatment. HR for death was 0.77 (95% CI 0.60-0.98;  $P = 0.04$ ).
